# Supplementary material
Source: PubMed Central journal article supplement (PMC3937299)
Supplement: NIHMS539572-supplement-All.pdf [file NIHMS539572-supplement-All.pdf]

## **SUPPLEMENTARY INFORMATION**

### **Allelic differences between Europeans and Chinese for CREB1 SNPs and their implications in gene expression regulation, hippocampal structure and function and bipolar disorder susceptibility**

Ming Li, Xiong-jian Luo, et al.

Correspondence to: Bing Su, Ph.D.; Tel.: +86-871-65120212; fax: +86-871-65193137;

Email: [sub@mail.kiz.ac.cn](mailto:sub@mail.kiz.ac.cn)

## **Members of the MoodS Bipolar Consortium**

Jana Strohmaier<sup>1</sup>, René Breuer<sup>1</sup>, Sandra Meier<sup>1</sup>, Thomas W. Mühlisen<sup>2,3</sup>, Franziska A. Degenhardt<sup>2,3</sup>, Per Hoffmann<sup>2,3</sup>, Stefan Herms<sup>2,3</sup>, Markus Schwarz<sup>4</sup>, Helmut Vedder<sup>4</sup>, Jutta Kammerer-Ciernioch<sup>4</sup>, Andreas Reif<sup>5</sup>, Johanna Sasse<sup>6</sup>, Michael Bauer<sup>6</sup>, Sandra Zwick<sup>7</sup>, Martin Hautzinger<sup>7</sup>, Adam Wright<sup>8</sup>, Philip B. Mitchell<sup>8</sup>, Janice M. Fullerton<sup>9</sup>, Peter R. Schofield<sup>9</sup>, Grant W. Montgomery<sup>10</sup>, Nicholas G. Martin<sup>10</sup>, Piotr M. Czerski<sup>11</sup>, Joanna Hauser<sup>11</sup>, Johannes Schumacher<sup>3</sup>, Wolfgang Maier<sup>12</sup>, Peter Propping<sup>3</sup>

<sup>1</sup>Department of Genetic Epidemiology in Psychiatry, Central Institute of Mental Health, University of Heidelberg, D-68159 Mannheim, Germany

<sup>2</sup>Department of Genomics, Life & Brain Center, University of Bonn, D-53127 Bonn, Germany

<sup>3</sup>Institute of Human Genetics, University of Bonn, D-53127 Bonn, Germany

<sup>4</sup>Psychiatric Center Nordbaden, D-69168 Wiesloch, Germany

<sup>5</sup>Department of Psychiatry, University of Würzburg, D-97070 Würzburg, Germany

<sup>6</sup>Department of Psychiatry and Psychotherapy, University Hospital Carl Gustav Carus, D-01307 Dresden, Germany

<sup>7</sup>Department of Clinical and Developmental Psychology, Institute of Psychology, University of Tübingen, D-72074 Tübingen, Germany

<sup>8</sup>School of Psychiatry, University of New South Wales and Black Dog Institute, Sydney, New South Wales, Australia

<sup>9</sup>Prince of Wales Medical Institute, University of New South Wales, NSW 2031 Sydney, Australia

<sup>10</sup>Queensland Institute of Medical Research, Brisbane Qld 4006, Australia

<sup>11</sup>Department of Psychiatry, Poznan University of Medical Sciences, PL-60-572 Poznan, Poland

<sup>12</sup>Department of Psychiatry, University of Bonn, D-53127 Bonn, Germany

## **Members of the Swedish Bipolar Study Group**

Lena Backlund<sup>1</sup>, Louise Fris  $\acute{a}$ <sup>1</sup>, Catharina Lavebratt<sup>2</sup>, Martin Schalling<sup>2</sup>, Urban  $\ddot{O}$ sby<sup>1</sup>

<sup>1</sup>Department of Clinical Neuroscience Neurogenetics Unit, Stockholm, Sweden

<sup>2</sup>Department of Molecular Medicine and Surgery, Karolinska Institute, Stockholm, Sweden

## **Replication Sample Information (see Table S2)**

### **French sample**

Patients with BD and controls were recruited as part of a large study on genetics of BD in France (Paris-Creteil, Bordeaux, Nancy) with a protocol approved by relevant IRBs and with written informed consent. Cases were of French descent for more than three generations and were all been assessed by a well-trained psychiatrist or psychologist with the DIGS<sup>1</sup> and the FIGS. Diagnoses were based on structured interviews supplemented by medical case notes, mood scales and a self rating questionnaire assessing dimensions. Genotyping of controls were provided by the Centre National de Génotypage (M Lathrop, Evry). Patients and controls were genotyped on the Illumina platform (HumanHap300, HumanHap550, HumanHap 610-quad).

### **Swedish sample**

SBP Bipolar cases were recruited from St. Göran's Hospital in Stockholm, Sweden. All participants provided written informed consent to participate in a genetic study of BD, and the study was approved by the Regional Ethics Committee of Stockholm. Diagnoses were based on physician administered ADE<sup>2</sup> and MINI<sup>3</sup>.

BD cases were identified from the Swedish Bipolar Quality Assurance Registry. Patient information within the registry includes disease sub-classification, psychosis, age at onset, number of manic and depressive episodes, number of hospitalizations and family history. Participants provided written informed consent to participate in a genetic study of psychiatric disease, and the study was approved by the Regional Ethics Committee of Stockholm.

Hospital Discharge Registry (HDR) Bipolar cases were identified from the Swedish Hospital Discharge Registry if they a) have at least two admissions with discharge diagnoses of BD and b) were born in Sweden or another Nordic country. The register contains a nearly complete record of all individuals hospitalized in Sweden since 1973. Diagnoses were established by an attending physician and were shown to have high sensitivity and specificity.<sup>4</sup> The study was approved by the Regional Ethics Committee of Stockholm. All participants provided written informed consent to participate in genetic studies of psychotic disorders and were interviewed by a research nurse about other medical conditions.

The SBP BD cases were recruited from the Stockholm County catchment area. All patients provided written informed consent to participate in a genetic study of BD, and the study was approved by the Regional Ethics Committee of Stockholm. Diagnoses were made according to the DSM-IV criteria.

Swedish control samples were obtained from the Swedish Hospital Discharge Registry on the condition they had never received discharge diagnoses of BD, schizophrenia and/or schizoaffective disorder.

### **German sample**

Cases were ascertained from consecutive admissions to the inpatient units of the Department of Psychiatry and Psychotherapy at the University of Bonn and at the Central Institute for Mental Health in Mannheim, University of Heidelberg, as well as at other collaborating psychiatric university hospitals in Germany. DSM-IV lifetime diagnoses of BD were assigned using a consensus best-estimate procedure, based on all available information, including semi-structured interviews (AMDP), medical records, and family history. In addition, the OPCRIT system<sup>5</sup> was used for the detailed poly-diagnostic documentation of symptoms.

Controls were ascertained from the population-based Heinz Nixdorf Recall Study.<sup>6</sup> Study protocols were reviewed and approved in advance by Institutional Review Boards of the participating institutions. All subjects provided written informed consent and were genotyped using the Illumina platform.

### **Australian sample**

Subjects were ascertained through two studies: 1) a BD pedigree sample (described in McAuley et al.<sup>7</sup>) and 2) a specialized Sydney Black Dog Institute BD clinic sample (described in Mitchell et al. 2009<sup>8</sup>). All subjects were interviewed by trained research staff using the DIGS or SCID, using best-estimate DSM-IV diagnoses derived from those instruments, medical records and FIGS. First, for the pedigree sample, only one BD subject per family was included in the case sample. Pedigrees were only included in the original genetic study if there was unilineal inheritance, and at least two BD subjects including at least one with bipolar I disorder. Subjects were ascertained through clinical presentations to the Mood Disorders Unit at the Prince of Wales Hospital in Sydney, direct referrals from Australian clinicians, and BD consumer

organizations. Second, for the clinic sample, subjects comprised consecutive subjects referred by psychiatrists or general practitioners for specialized clinical review. All patients provided written informed consent to participate in this study and the study was approved by the local ethics committee. Patients were included in the BOMA study and genotyped at the Life & Brain Centre in Bonn.

Australian controls were drawn from families participating in the Brisbane Longitudinal Twin Study, an unselected community sample recruited to take part in studies of melanoma risk factors, cognition, and other phenotypes. Subjects were not screened for any phenotype relevant to BD. The study was approved by the ethic committee and all proband gave written informed consent. All subjects were genotyped as a single project by deCODE and have been through an extensive QC process including exclusion for non-European ancestry. The sample is overwhelmingly of northern European origin, predominately from the British Isles.

### **Polish sample**

All patients were recruited from consecutive hospital admissions and were directly interviewed with the Structured Clinical Interview for DSM-IV-TR-Axis I Disorders (Patient Edition). Information provided via medical records and interviews of family members was also used in a best estimate procedure of diagnosis on the basis of DSM-IV-TR criteria. The control samples were population-based, drawn from the same population as the patients. The ethnicity of the patients and control subjects was determined by genealogical investigation up to the grandparental generation.

### **Icelandic sample**

The Icelandic sample consisted of 541 subjects with BD and 34,546 population controls. Patients and controls were Icelandic and were recruited throughout the country. Diagnoses were assigned according to RDC through the use of the SADS-L for 303 subjects. DSM-IV BD diagnoses were obtained through the use of the Composite International Diagnostic Interview (CIDI-Auto) for 82 subjects. In addition, there were 150 subjects with ICD-9 or ICD-10 BD diagnoses and nine subjects with DSM-III BD diagnoses.

The 34,546 controls were recruited as a part of various genetic programs at deCODE and were not screened for psychiatric disorders. Approval for the study was granted by the National Bioethics Committee of Iceland and the Icelandic Data Protection Authority and written informed consent was obtained for all participants.

### **British sample**

The British sample consists of 1,636 cases of recurrent depression fulfilling DSM-IV or ICD-10 criteria of at least moderate severity, ascertained from three U.K. centers (London, Cardiff, Birmingham).<sup>9</sup> Proband from the Depression Network affected sibling pair linkage study<sup>10,11</sup> are cases of recurrent depression of at least moderate severity. The pharmacogenetic study, the Genome-Based Therapeutic Drugs for Depression (GENDEP) study, is comprised of subjects who have been investigated while in an episode of depression of at least moderate severity.<sup>12,13</sup>

All cases were interviewed with the Schedules for Clinical Assessment in Neuropsychiatry (SCAN),<sup>14</sup> focusing on their worst and second-worst episodes of depression in the studies and on their current episode in GENDEP, with study coordinators for all three studies trained by one investigator, giving a homogenous cohort of depression cases. Subjects were excluded if there was a history or family history of schizophrenia or bipolar disorder or if mood symptoms were related to alcohol or substance misuse.

The control subjects were 1,594 individuals contacted via the Medical Research Council general practice research framework and screened using a composite index of depressive and anxiety symptoms;<sup>15</sup> they were interviewed by telephone using the Past History Schedule.<sup>16</sup>

### **Munich-German sample**

In total, 640 unipolar depressive inpatients were recruited for the Munich Antidepressant Response Signature (MARS) project at the Max Planck Institute of Psychiatry (MPIP) in Munich, Germany.<sup>17,18</sup> Briefly, patients were included in the study within 1-3 days of admission to the hospital and diagnosis was ascertained according to the Diagnostic and Statistical Manual of Mental Disorders (DSM) IV criteria. Patients fulfilling the criteria for at least a moderate depressive episode (HAM-D R 14 on the 21-item Hamilton Depression Rating Scale) were included in the analysis. All patients were of European descent. In total, 542 control subjects were matched to the patient sample for age, gender, and ethnicity from a randomly selected Munich-based community sample and underwent a strict screening procedure for the absence of psychiatric and severe somatic disease.<sup>19</sup> The overall inclusion rate of all contacted proband

was 50.3%. These subjects thus represent a group of individuals from the general population who have never been diagnosed as mentally ill. Age, sex, and ethnicity did not differ from the patient sample.

## **Functional Magnetic Resonance Imaging Analysis**

Functional magnetic resonance images were obtained from healthy German participants (N=279) of European ancestry, as part of a tricentric study on the neurogenetic mechanisms of psychiatric disease.<sup>20-22</sup> The study was approved by the local ethics committee of the Universities of Bonn, Mannheim and Berlin. All subjects provided written informed consent to participate in the study.

Genotypes for rs2709370 and rs6785 were imputed based on the data from the 1000-Human-Genome reference samples<sup>23</sup> (2010 interim release in NCBI build 37 coordinates; the 1000-Human-Genome Project Consortium) and using IMPUTE2.<sup>24</sup> Post-imputation quality control was applied using an info score of 0.8 and a minor allele frequency of 0.01.

The allele frequencies for rs2709370 were in the Hardy-Weinberg equilibrium ( $\chi^2 = 0.022$ ,  $P = 0.88$ ). Genotype distributions did not differ between sites ( $P = 0.77$ ). Sex, age, handedness and level of education, did not significantly differ between genotype groups (**Table S6**).

Blood oxygenation level-dependent (BOLD) functional magnetic resonance imaging (fMRI) was performed on a Siemens TRIO 3T scanner at each site (33 slices, slice thickness 2.4 mm + 0.6 mm gap, FOV 192 mm, TR 1.96 sec, TE 30 ms). Quality assurance (QA) measures were conducted on every measurement day at all sites according to a multicenter QA protocol revealing stable signals over time.<sup>25</sup> During scanning, participants completed three consecutive blocks of memory tasks (encoding, recall and recognition of face-profession pairs), as previously reported.<sup>20-22</sup> Image processing and statistical analyses were conducted using statistical parametric mapping methods as implemented in Statistical Parametric Mapping 8 (SPM8) and included realignment, slice timing, normalization to a standard EPI template and smoothing. The regression model at the first level consisted of two regressors (memory and control) convolved with the hemodynamic response function and six regressors describing residual motion. In the second level group, individual regionally specific effects of the contrast memory > contour were compared using a multiple regression model including the three allelic groups and age, sex and site as covariates. T-statistics for each voxel were threshold at  $P < 0.05$  family wise error (FWE) corrected for multiple comparisons across the region of interest (hippocampus).

## **Cognitive Performance Analyses**

### **Irish sample**

This sample consisted of 88 healthy individuals recruited on the basis of responses to local media advertisements and were reported previously.<sup>26,27</sup> Participants were included only if they were aged 18 to 65 years and satisfied, based on clinical interview, the criteria of having no history of major mental health problems, intellectual disability, or acquired brain injury and also no self-reported history of substance misuse in the preceding 6 months. Participants were also excluded from the study if they reported having a first-degree relative with a history of psychosis. All the subject assessments were conducted in accordance with the relevant ethics committee approval from each participating site. All subjects were of Irish ancestry (*i.e.*, 4 grandparents born in Ireland), and all provided written informed consent.

### **Cognitive Assessment**

*General Cognitive Functioning (IQ).* IQ was measured using selected subtests (vocabulary, similarities, block design, and matrix reasoning) from the Wechsler Adult Intelligence Scale, third edition, yielding full-scale, verbal, and performance IQs.

*Episodic Memory recall.* Verbal episodic memory and visual episodic memory were assessed using the logical memory and faces subtests respectively, from the Wechsler Memory Scale, third edition.

*Working Memory.* Verbal working memory and spatial working memory were assessed using the letter-number sequencing task from the Wechsler Memory Scale, third edition, and the spatial working memory task from the Cambridge Neuropsychological Test Automated Battery, Expeditio Version.

*Attention.* Attention was assessed using the continuous performance test, identical pairs version.

*Social cognition.* Social cognition was measured using both the Eyes of the mind and the Hinting task to index theory of mind, while the Interpersonal and situational attribution task (IPSAQ) was used to index attributional style.

### **Statistical Analysis**

To inform appropriate adjustments in the primary cognitive analyses, the associations of CREB1 with demographic variables were investigated using 1-way analysis of variance. There was no difference in age, years of education, or sex distribution between the genotype groups. Association of CREB1 with the phenotypes of IQ, episodic memory, working memory, attention and social cognition was conducted using a general factorial design in SPSS statistical software v14.0 (SPSS Inc, Chicago, Illinois). In a series of analyses of variance, scores for each neuropsychological subtest were entered as dependent variables, with age and sex included as covariates as appropriate.



**Table S1. Description of individual samples included in replication analysis**

| <b>Sample</b>         | <b>Ancestry</b> | <b>Cases</b>     | <b>Case diagnosis</b> | <b>Controls</b> | <b>Genotyping Platform</b> | <b><math>\lambda</math></b> | <b>Ref.</b> |
|-----------------------|-----------------|------------------|-----------------------|-----------------|----------------------------|-----------------------------|-------------|
| <b>France</b>         | French          | 451              | BD1,BD2,BD-NOS        | 1,631           | Illumina platform          | 1.03                        | 28,29       |
| <b>Sweden</b>         | Swedish         | 836 <sup>a</sup> | BD1,BD2,BD-NOS        | 2,093           | Affymetrix 6.0             | 1.07                        | 28          |
| <b>Germany</b>        | German          | 181              | BD1,BD2,SAB,BD-NOS    | 527             | Illumina platform          | 1.00                        | 30,31       |
| <b>Australia</b>      | Australian      | 330              | BD1,BD2,SAB,BD-NOS    | 1,811           | Illumina platform          | 1.00                        | 8,30,32,33  |
| <b>Poland</b>         | Polish          | 411              | BD1,BD2               | 504             | Illumina platform          | /                           | 30          |
| <b>Iceland</b>        | Icelandic       | 544 <sup>b</sup> | BD1,BD2,BD-NOS        | 34,426          | Affymetrix 6.0             | 1.11                        | 34          |
| <b>U.K.</b>           | British         | 1,636            | MDD                   | 1,594           | Illumina HumanHap610       | 1.02                        | 35          |
| <b>Munich-Germany</b> | German          | 640              | MDD                   | 542             | Illumina HumanHap300       | 1.02                        | 36          |
| <b>Total</b>          | /               | 5,029            | /                     | 43,128          | /                          | /                           | /           |

<sup>a</sup> Diagnoses were made from hospital discharge records 226 of the samples, and thus DSM-IV subtypes are unavailable. Subtypes are given for 599 of the cases.

<sup>b</sup> DSM-IV diagnoses were not available for 150 subjects who had been collected under earlier diagnostic criteria and described above.

$\lambda$  = genomic control lambda.

Abbreviations: BD1, bipolar disorder type 1; BD2, bipolar disorder type 2; BD-NOS, bipolar disorder not otherwise specified; SCZ, schizophrenia; MDD, major depressive disorder; SAB, schizoaffective disorder (bipolar type).

**Table S2. Demographic details of samples in the Stanley Neuropathology Consortium Integrative Database**

|                      | <b>Schizophrenia</b> | <b>Bipolar Disorder</b> | <b>Major Depression</b> | <b>Normal Controls</b> |
|----------------------|----------------------|-------------------------|-------------------------|------------------------|
| Age(y)               | 44.2 (25~62)         | 42.3 (25~61)            | 46.4 (30~65)            | 48.1 (29~68)           |
| Sex                  | 9M, 6F               | 9M, 6F                  | 9M, 6F                  | 9M, 6F                 |
| Race                 | 13C, 2A              | 14C, 1AA                | 15C                     | 14C, 1AA               |
| PMI (hs)             | 33.7 (12~61)         | 32.5 (13~62)            | 27.5 (7~47)             | 23.7 (8~42)            |
| pH                   | 6.1 (5.8~6.6)        | 6.2 (5.8~6.5)           | 6.2 (5.6~6.5)           | 6.3 (5.8~6.6)          |
| Side of Brain Frozen | 6R, 9L               | 8R, 7L                  | 6R, 9L                  | 7R, 8L                 |

**Note:**

M, male; F, female; C, Caucasian; AA, African American; R, right; L, left.

**Table S3. Bioinformatics screen of the cis-eQTL SNPs in CREB1 using the Regulome DB tools**

| SNP              | Position         | Regulome DB score | Motifs                      |                             | Protein binding |                  | Chromatin structure        |                                                 | Histone modifications |                 |
|------------------|------------------|-------------------|-----------------------------|-----------------------------|-----------------|------------------|----------------------------|-------------------------------------------------|-----------------------|-----------------|
|                  |                  |                   | Method                      | Motif                       | Method          | Bound protein    | Method                     | Chromatin structure                             | Method                | Histone Mark    |
| rs2709370        | 208382602        | 6                 | PWM                         | 2 motifs                    | /               | /                | /                          | /                                               | ChIP-seq              | multiple        |
| rs2709371        | 208384687        | No data           | /                           | /                           | /               | /                | /                          | /                                               | /                     | /               |
| rs2709373        | 208386024        | 6                 | PWM                         | 2 motifs                    | /               | /                | FAIRE                      | 1 chromatin structure                           | ChIP-seq              | multiple        |
| rs2709374        | 208386604        | 6                 | PWM                         | 5 motifs                    | /               | /                | FAIRE                      | 1 chromatin structure                           | ChIP-seq              | multiple        |
| rs2551660        | 208386799        | No data           | /                           | /                           | /               | /                | /                          | /                                               | /                     | /               |
| rs2709375        | 208388923        | 5                 | /                           | /                           | /               | /                | FAIRE                      | 2 chromatin structures                          | ChIP-seq              | multiple        |
| rs2551637        | 208392132        | No data           | /                           | /                           | /               | /                | DNase-seq                  | 2 chromatin structures                          | /                     | /               |
| rs2709377        | 208393907        | 4                 | /                           | /                           | ChIP-seq        | 4 bound proteins | FAIRE                      | 4 chromatin structures                          | ChIP-seq              | multiple        |
| <b>rs2464976</b> | <b>208394531</b> | <b>2b</b>         | <b>PWM<br/>Footprinting</b> | <b>1 motif<br/>multiple</b> | <b>ChIP-seq</b> | <b>multiple</b>  | <b>FAIRE<br/>DNase-seq</b> | <b>multiple<br/>multiple</b>                    | <b>ChIP-seq</b>       | <b>multiple</b> |
| rs2551639        | 208396187        | 3a                | PWM                         | 1 motif                     | ChIP-seq        | 1 bound protein  | FAIRE                      | 8 chromatin structures                          | ChIP-seq              | multiple        |
| rs889895         | 208398929        | 5                 | PWM<br>Footprinting         | 2 motifs<br>3 motifs        | /               | /                | DNase-seq                  | 2 chromatin structures                          | ChIP-seq              | multiple        |
| rs2551641        | 208410267        | 5                 | /                           | /                           | ChIP-seq        | 1 bound protein  | /                          | /                                               | ChIP-seq              | multiple        |
| rs2709356        | 208412092        | 5                 | PWM                         | 1 motif                     | /               | /                | FAIRE<br>DNase-seq         | 2 chromatin structures<br>1 chromatin structure | ChIP-seq              | multiple        |
| rs2709357        | 208412532        | 6                 | PWM                         | multiple                    | /               | /                | /                          | /                                               | ChIP-seq              | multiple        |
| rs2551642        | 208413497        | 6                 | PWM                         | 1 motif                     | /               | /                | /                          | /                                               | ChIP-seq              | multiple        |
| rs2709398        | 208417937        | No data           | /                           | /                           | /               | /                | /                          | /                                               | /                     | /               |
| rs2709399        | 208418101        | No data           | /                           | /                           | /               | /                | /                          | /                                               | /                     | /               |
| rs2709400        | 208418313        | No data           | /                           | /                           | /               | /                | /                          | /                                               | /                     | /               |
| rs2551917        | 208418332        | No data           | /                           | /                           | /               | /                | /                          | /                                               | /                     | /               |
| rs2709402        | 208420977        | No data           | /                           | /                           | /               | /                | /                          | /                                               | /                     | /               |
| rs2709403        | 208422263        | 6                 | PWM                         | 2 motif                     | /               | /                | /                          | /                                               | ChIP-seq              | multiple        |
| rs2709404        | 208422335        | No data           | /                           | /                           | /               | /                | /                          | /                                               | /                     | /               |
| rs2709378        | 208423429        | No data           | /                           | /                           | /               | /                | /                          | /                                               | /                     | /               |
| rs2709381        | 208429159        | No data           | /                           | /                           | /               | /                | /                          | /                                               | /                     | /               |
| rs2551919        | 208430383        | No data           | /                           | /                           | /               | /                | /                          | /                                               | /                     | /               |
| rs2551920        | 208431830        | 1f                | /                           | /                           | /               | /                | DNase-seq                  | 1 chromatin structure                           | ChIP-seq              | multiple        |
| rs2709385        | 208434645        | No data           | /                           | /                           | /               | /                | /                          | /                                               | /                     | /               |
| rs2551921        | 208435555        | 4                 | /                           | /                           | ChIP-seq        | 1 bound protein  | FAIRE<br>DNase-seq         | 1 chromatin structure<br>1 chromatin structure  | ChIP-seq              | multiple        |
| rs2551643        | 208437433        | 6                 | PWM                         | 1 motif                     | /               | /                | /                          | /                                               | ChIP-seq              | multiple        |
| rs2551644        | 208440724        | 6                 | PWM                         | multiple                    | /               | /                | /                          | /                                               | ChIP-seq              | multiple        |
| rs2551923        | 208441776        | No data           | /                           | /                           | /               | /                | /                          | /                                               | /                     | /               |
| rs2709387        | 208442095        | 6                 | /                           | /                           | /               | /                | /                          | /                                               | ChIP-seq              | multiple        |
| rs2709388        | 208443011        | 6                 | PWM                         | 5 motifs                    | /               | /                | FAIRE                      | 1 chromatin structure                           | ChIP-seq              | multiple        |
| rs2551924        | 208443372        | 6                 | PWM                         | 1 motif                     | /               | /                | /                          | /                                               | ChIP-seq              | multiple        |
| rs2709389        | 208448995        | 5                 | PWM                         | 3 motifs                    | /               | /                | DNase-seq                  | 1 chromatin structure                           | ChIP-seq              | multiple        |

|                   |           |         |     |          |   |   |                    |                                                |                   |
|-------------------|-----------|---------|-----|----------|---|---|--------------------|------------------------------------------------|-------------------|
| <b>rs34903544</b> | 208449146 | No data | /   | /        | / | / | /                  | /                                              | /                 |
| <b>rs2551646</b>  | 208451166 | No data | /   | /        | / | / | /                  | /                                              | /                 |
| <b>rs2551647</b>  | 208451238 | No data | /   | /        | / | / | /                  | /                                              | /                 |
| <b>rs2709392</b>  | 208454639 | No data | /   | /        | / | / | /                  | /                                              | /                 |
| <b>rs2247053</b>  | 208457063 | No data | /   | /        | / | / | /                  | /                                              | /                 |
| <b>rs2952766</b>  | 208457362 | 6       | PWM | 1 motif  | / | / | /                  | /                                              | ChIP-seq multiple |
| <b>rs2464978</b>  | 208457918 | No data | /   | /        | / | / | /                  | /                                              | /                 |
| <b>rs34775277</b> | 208458129 | 6       | PWM | 1 motif  | / | / | /                  | /                                              | ChIP-seq multiple |
| <b>rs2709362</b>  | 208459822 | No data | /   | /        | / | / | /                  | /                                              | /                 |
| <b>rs13029936</b> | 208465544 | 5       | /   | /        | / | / | FAIRE<br>DNase-seq | 1 chromatin structure<br>1 chromatin structure | ChIP-seq multiple |
| <b>rs2551928</b>  | 208465778 | No data | /   | /        | / | / | /                  | /                                              | /                 |
| <b>rs1806584</b>  | 208466270 | 6       | PWM | 4 motifs | / | / | /                  | /                                              | ChIP-seq multiple |
| <b>rs1045780</b>  | 208467150 | No data | /   | /        | / | / | /                  | /                                              | /                 |
| <b>rs6785</b>     | 208467997 | 6       | /   | /        | / | / | /                  | /                                              | ChIP-seq multiple |

**Note:**

when the number of predicted transcription factor binding motifs (or protein binding sequences, chromatin structures, histone marks) is more than 10, we indicated it as “multiple” instead.

The methods for the bioinformatics screen on ENCODE data have been described previously, which can be found from Boyle et al study.<sup>37</sup>

**Table S4. Association results of SNPs spanning CREB1 region with BD in the PGC BD GWAS samples and their allele frequencies in three major populations**

| SNP ID           | Position         | Location            | Allele   | P-values                                | OR           | Allele Frequency |          |              |
|------------------|------------------|---------------------|----------|-----------------------------------------|--------------|------------------|----------|--------------|
|                  |                  |                     |          |                                         |              | CEU              | CHB      | YRI          |
| <b>rs2709370</b> | <b>208382602</b> | <b>5' near gene</b> | <b>C</b> | <b><math>1.80 \times 10^{-3}</math></b> | <b>1.094</b> | <b>0.224</b>     | <b>0</b> | <b>0.142</b> |
| <b>rs2709371</b> | <b>208384687</b> | <b>5' near gene</b> | <b>G</b> | <b><math>2.93 \times 10^{-3}</math></b> | <b>1.091</b> | <b>0.212</b>     | <b>0</b> | <b>0.148</b> |
| <b>rs2709373</b> | <b>208386024</b> | <b>5' near gene</b> | <b>C</b> | <b><math>2.15 \times 10^{-3}</math></b> | <b>1.094</b> | <b>0.212</b>     | <b>0</b> | <b>0.142</b> |
| rs2253206        | 208391978        | 5' near gene        | A        | 0.704                                   | 1.010        | 0.494            | 0.402    | 0.324        |
| <b>rs2551639</b> | <b>208396187</b> | <b>intron</b>       | <b>G</b> | <b><math>9.15 \times 10^{-4}</math></b> | <b>1.103</b> | <b>0.212</b>     | <b>0</b> | <b>0.142</b> |
| <b>rs889895</b>  | <b>208398929</b> | <b>intron</b>       | <b>G</b> | <b><math>8.20 \times 10^{-4}</math></b> | <b>1.104</b> | <b>0.212</b>     | <b>0</b> | <b>0.142</b> |
| rs2551640        | 208407893        | intron              | A        | 0.529                                   | 0.985        | 0.376            | 0.402    | 0.33         |
| <b>rs2709356</b> | <b>208412092</b> | <b>intron</b>       | <b>T</b> | <b><math>9.35 \times 10^{-4}</math></b> | <b>1.102</b> | <b>0.206</b>     | <b>0</b> | <b>0.142</b> |
| <b>rs2709399</b> | <b>208418101</b> | <b>intron</b>       | <b>T</b> | <b><math>9.84 \times 10^{-4}</math></b> | <b>1.102</b> | <b>0.206</b>     | <b>0</b> | <b>0.142</b> |
| <b>rs2709402</b> | <b>208420977</b> | <b>intron</b>       | <b>A</b> | <b><math>9.98 \times 10^{-4}</math></b> | <b>1.102</b> | <b>0.206</b>     | <b>0</b> | <b>0.142</b> |
| rs10932201       | 208426257        | intron              | A        | $1.04 \times 10^{-3}$                   | 0.925        | 0.463            | 0.604    | 0.127        |
| rs11904814       | 208426798        | intron              | G        | 0.326                                   | 1.025        | 0.341            | 0.402    | 0.165        |
| rs6740584        | 208429351        | intron              | C        | $9.07 \times 10^{-4}$                   | 0.924        | 0.418            | 0.598    | 0.057        |
| <b>rs2551919</b> | <b>208430383</b> | <b>intron</b>       | <b>T</b> | <b><math>9.24 \times 10^{-4}</math></b> | <b>1.103</b> | <b>0.206</b>     | <b>0</b> | <b>0.148</b> |
| <b>rs2551920</b> | <b>208431830</b> | <b>intron</b>       | <b>G</b> | <b><math>9.79 \times 10^{-4}</math></b> | <b>1.102</b> | <b>0.206</b>     | <b>0</b> | <b>0.142</b> |
| <b>rs2551921</b> | <b>208435555</b> | <b>intron</b>       | <b>C</b> | <b><math>8.85 \times 10^{-4}</math></b> | <b>1.103</b> | <b>0.206</b>     | <b>0</b> | <b>0.142</b> |
| rs17811997       | 208440836        | intron              | C        | $3.09 \times 10^{-3}$                   | 0.834        | 0.065            | 0        | 0            |
| <b>rs2551923</b> | <b>208441776</b> | <b>intron</b>       | <b>T</b> | <b><math>1.22 \times 10^{-3}</math></b> | <b>1.101</b> | <b>0.206</b>     | <b>0</b> | <b>0.148</b> |
| <b>rs2709387</b> | <b>208442095</b> | <b>intron</b>       | <b>A</b> | <b><math>8.61 \times 10^{-4}</math></b> | <b>1.103</b> | <b>0.206</b>     | <b>0</b> | <b>0.205</b> |
| rs2254137        | 208444028        | intron              | A        | 0.448                                   | 0.982        | 0.629            | 0.598    | 0.392        |
| <b>rs2464978</b> | <b>208457918</b> | <b>intron</b>       | <b>A</b> | <b><math>1.00 \times 10^{-3}</math></b> | <b>1.102</b> | <b>0.206</b>     | <b>0</b> | <b>0.142</b> |
| <b>rs2551928</b> | <b>208465778</b> | <b>3'UTR</b>        | <b>A</b> | <b><math>6.74 \times 10^{-4}</math></b> | <b>1.106</b> | <b>0.212</b>     | <b>0</b> | <b>0.244</b> |
| <b>rs1806584</b> | <b>208466270</b> | <b>3'UTR</b>        | <b>G</b> | <b><math>5.54 \times 10^{-4}</math></b> | <b>1.107</b> | <b>0.206</b>     | <b>0</b> | <b>0.011</b> |
| <b>rs1045780</b> | <b>208467150</b> | <b>3'UTR</b>        | <b>A</b> | <b><math>5.62 \times 10^{-4}</math></b> | <b>1.107</b> | <b>0.206</b>     | <b>0</b> | <b>0.142</b> |
| <b>rs6785</b>    | <b>208467997</b> | <b>3'UTR</b>        | <b>A</b> | <b><math>3.38 \times 10^{-4}</math></b> | <b>1.111</b> | <b>0.206</b>     | <b>0</b> | <b>0.142</b> |

SNP position is defining according to the NCBI, GRCh37.p5 version.  
The risk and cis-eQTL SNPs are marked in red color and bold.

**Table S5. Association results of risk SNPs in CREB1 in each European replication sample**

| Study group (N cases/N controls) | rs2709370 [C]       |                       | rs6785 [A]          |                       |
|----------------------------------|---------------------|-----------------------|---------------------|-----------------------|
|                                  | <i>P</i> value      | OR (SE)               | <i>P</i> value      | OR (SE)               |
| France (451/1,631)               | 0.4111              | 1.083 (0.0970)        | 0.5095              | 1.066 (0.0962)        |
| Sweden (836/2,093)               | 0.5008              | 1.050 (0.0720)        | 0.5084              | 1.051 (0.0753)        |
| Germany (181/527)                | 0.2414              | 1.180 (0.1532)        | 0.1445              | 1.235 (0.1521)        |
| Australia (330/1,811)            | <i>0.4666</i>       | <i>0.927 (0.1058)</i> | <i>0.6623</i>       | <i>0.956 (0.1084)</i> |
| Poland (411/504)                 | 0.0536              | 1.208 (0.1077)        | 0.0891              | 1.186 (0.1081)        |
| Iceland (544/34,426)             | 0.8618              | 1.012 (0.0735)        | <i>0.8655</i>       | <i>0.987 (0.0773)</i> |
| U.K. (1,636/1,594)               | 0.2897 <sup>1</sup> | 1.072 (0.0655)        | 0.3098 <sup>2</sup> | 1.069 (0.0658)        |
| Munich-Germany (640/542)         | 0.0903              | 1.187 (0.1011)        | 0.1246              | 1.171 (0.1030)        |

**Abbreviations:**

OR, odds ratio; SE, standard error.

<sup>1</sup>rs2709373 (the 1000-Human-Genome, CEU  $r^2=0.93$  with rs2709370)

<sup>2</sup>rs2551949 (the 1000-Human-Genome, CEU  $r^2=1.00$  with rs6785)

**Table S6. Association of rs2709370 with demographic characteristics in the German fMRI sample**

|                      | <b>CC (N=14)</b> | <b>AC (N=99)</b> | <b>AA (N=166)</b> | <b><i>P</i> value</b> |
|----------------------|------------------|------------------|-------------------|-----------------------|
| Age (y)              | 33.5 (19~48)     | 34.0 (18~50)     | 34.8 (18~51)      | 0.77                  |
| Sex (M/F)            | 4M, 10F          | 46M, 53F         | 83M, 83F          | 0.29                  |
| Handedness (L/R)*    | 0/14             | 3/83             | 10/151            | 0.38                  |
| School education (y) | 6.21 (4~7)       | 6.04 (3~7)       | 6.25 (3~7)        | 0.30                  |

y=years, M=male, F=female, L=left, R=right, \* 7 data points missing

**Table S7. Analyses on cognitive performance by rs2709370 genotype in the Irish sample**

| Cognitive performance      | Test or Subscale                     | N  | Mean (SD)    |              |              | F <sub>Main effect</sub> | P value |
|----------------------------|--------------------------------------|----|--------------|--------------|--------------|--------------------------|---------|
|                            |                                      |    | AA           | AC           | CC           |                          |         |
| <i>IQ</i>                  | Abbreviated Full Scale IQ            | 87 | 124.4 (13.2) | 125 (14.1)   | 126 (15.6)   | 0.027                    | 0.974   |
|                            | WTAR (Adult reading test)            | 87 | 110.2 (4.6)  | 110.5 (4.5)  | 109.5 (4.9)  | 0.112                    | 0.894   |
|                            | Verbal IQ                            | 87 | 126.7 (14.6) | 125.5 (14.9) | 133.5 (16.2) | 0.294                    | 0.746   |
|                            | Performance IQ                       | 87 | 118.8 (15.6) | 120.4 (17.5) | 115 (8.5)    | 0.157                    | 0.855   |
| <i>Working Memory</i>      | LN sequence                          | 86 | 12.8 (2.8)   | 11.8 (3.5)   | 15 (2.8)     | 1.49                     | 0.23    |
|                            | CANTAB SWM (Between error)           | 87 | 0.19 (0.86)  | 0.3 (0.7)    | 0.8 (0.2)    | 0.678                    | 0.511   |
| <i>Episodic Memory</i>     | Logical Memory Immediate             | 88 | 13.3 (2.7)   | 12.6 (2.7)   | 15 (1.4)     | 1.132                    | 0.327   |
|                            | Logical Memory Delayed               | 88 | 13.9 (2.6)   | 13.1 (3.47)  | 14.5 (.707)  | 0.81                     | 0.448   |
|                            | CANTAB PAL (Adjusted Standard score) | 85 | 0.42 (0.8)   | -0.03 (1.5)  | 0.13 (0.38)  | 1.627                    | 0.203   |
|                            | Faces 1                              | 87 | 11.9 (2.8)   | 10.5 (2.6)   | 10 (0)       | 2.619                    | 0.079   |
|                            | Faces 2                              | 87 | 11.5 (2.3)   | 10.6 (2.7)   | 9.5 (3.5)    | 1.614                    | 0.205   |
| <i>Attentional Control</i> | IDED (8 shapes adjusted)             | 84 | 9.1 (9.8)    | 5.1 (6.3)    | 7.5 (3.5)    | 1.85                     | 0.164   |
|                            | IDED (6 shapes adjusted))            | 84 | 0.87 (2.9)   | 0.62 (1.21)  | 1 (0)        | 0.091                    | 0.913   |
| <i>Social Cognition</i>    | Hinting Task                         | 82 | 16.8 (1.8)   | 16.7 (1.7)   | 17.5 (2.1)   | 0.171                    | 0.84    |
|                            | Reading the Eyes in the mind         | 82 | 26.6 (3.1)   | 25.2 (2.3)   | 26.5 (3.5)   | 2.3                      | 0.1     |
|                            | IPSAQ (externalizing bias)           | 82 | 0.26 (4.2)   | 1.2 (3.1)    | 1 (2.8)      | 0.52                     | 0.59    |
|                            | IPSAQ (personalizing bias)           | 82 | 0.59 (0.23)  | 0.59 (0.25)  | 0.65 (0.21)  | 0.056                    | 0.95    |



**Table S8. Analyses on cognitive performance by rs6785 genotype in the Irish sample**

| Cognitive function         | Test or Subscale                     | N  | Mean (SD)    |             |              | F <sub>Main effect</sub> | P value |
|----------------------------|--------------------------------------|----|--------------|-------------|--------------|--------------------------|---------|
|                            |                                      |    | AA           | AG          | GG           |                          |         |
| <i>IQ</i>                  | Abbreviated Full Scale IQ            | 87 | 126 (5.6)    | 125 (14)    | 124 (13.2)   | 0.048                    | 0.95    |
|                            | WTAR (Adult reading test)            | 87 | 109.5 (4.9)  | 110.2 (4.6) | 110.2 (4.6)  | 0.029                    | 0.97    |
|                            | Verbal IQ                            | 87 | 133.5 (16.2) | 124 (15.1)  | 127.1 (14.4) | 0.62                     | 0.54    |
|                            | Performance IQ                       | 87 | 115 (8.5)    | 122 (17.2)  | 118.2 (15.6) | 0.57                     | 0.56    |
| <i>Working Memory</i>      | LN sequence                          | 86 | 15 (2.8)     | 119 (3.6)   | 12.7 (2.8)   | 1.29                     | 0.27    |
| <i>Memory</i>              | CANTAB SWM (Between error)           | 87 | 0.81 (0.2)   | 0.37 (0.64) | 0.17 (0.87)  | 1.03                     | 0.36    |
| <i>Episodic Memory</i>     | Logical Memory Immediate             | 88 | 15 (1.4)     | 12.5 (2.6)  | 13.4 (2.7)   | 1.48                     | 0.232   |
|                            | Logical Memory Delayed               | 88 | 14.5 (0.71)  | 12.9 (3.5)  | 14 (2.6)     | 1.3                      | 0.27    |
|                            | CANTAB PAL (Adjusted Standard score) | 85 | 0.13 (0.38)  | -0.02 (1.6) | 0.39 (0.8)   | 1.2                      | 0.29    |
|                            | Faces 1                              | 87 | 10 (0)       | 10.7 (2.6)  | 11.4 (2.5)   | 1.1                      | 0.35    |
|                            | Faces 2                              | 87 | 9.5 (3.5)    | 10.7 (2.6)  | 11.4 (2.5)   | 1.1                      | 0.35    |
| <i>Attentional Control</i> | IDED (8 shapes adjusted)             | 84 | 7.5 (3.5)    | 5.3 (6.7)   | 8.7 (9.6)    | 1.2                      | 0.304   |
| <i>Control</i>             | IDED (6 shapes adjusted)             | 84 | 1 (0)        | 0.67 (1.3)  | 0.84 (2.8)   | 0.049                    | 0.952   |
| <i>Social Cognition</i>    | Hinting Task                         | 82 | 17.5 (2.1)   | 16.7 (1.7)  | 16.8 (1.7)   | 0.19                     | 0.83    |
|                            | Reading the Eyes in the mind         | 82 | 26.5 (3.5)   | 25.2 (2.3)  | 26.5 (3.1)   | 1.5                      | 0.22    |
|                            | IPSAQ (externalizing bias)           | 82 | 1 (2.8)      | 1.3 (3.1)   | 0.23 (4.1)   | 0.76                     | 0.46    |
|                            | IPSAQ (personalizing bias)           | 82 | 0.65 (0.21)  | 0.56 (0.24) | 0.6 (0.23)   | 0.36                     | 0.69    |

**Table S9. Results of SNP association analyses with CREB1 expression in brain samples of the Stanley Neuropathology Consortium Integrative Database**

|                  | <b>Frontal Cortex</b> | <b>Cerebellum</b>     | <b>Thalamus</b>       | <b>Hippocampus</b>     |
|------------------|-----------------------|-----------------------|-----------------------|------------------------|
| <b>rs2709370</b> | $3.63 \times 10^{-8}$ | $4.22 \times 10^{-6}$ | /                     | $2.22 \times 10^{-9}$  |
| <b>rs2709373</b> | $1.23 \times 10^{-7}$ | /                     | $2.34 \times 10^{-6}$ | $1.62 \times 10^{-9}$  |
| <b>rs6785</b>    | $7.45 \times 10^{-7}$ | /                     | $2.34 \times 10^{-6}$ | $5.17 \times 10^{-10}$ |
| <b>rs2551949</b> | $7.45 \times 10^{-7}$ | /                     | $2.34 \times 10^{-6}$ | $5.17 \times 10^{-10}$ |

**Figure S1. Linkage disequilibrium (LD) structure of the risk SNPs spanning CREB1 in Europeans, and the LD value of tested SNPs were calculated using the  $r^2$  algorithm.**

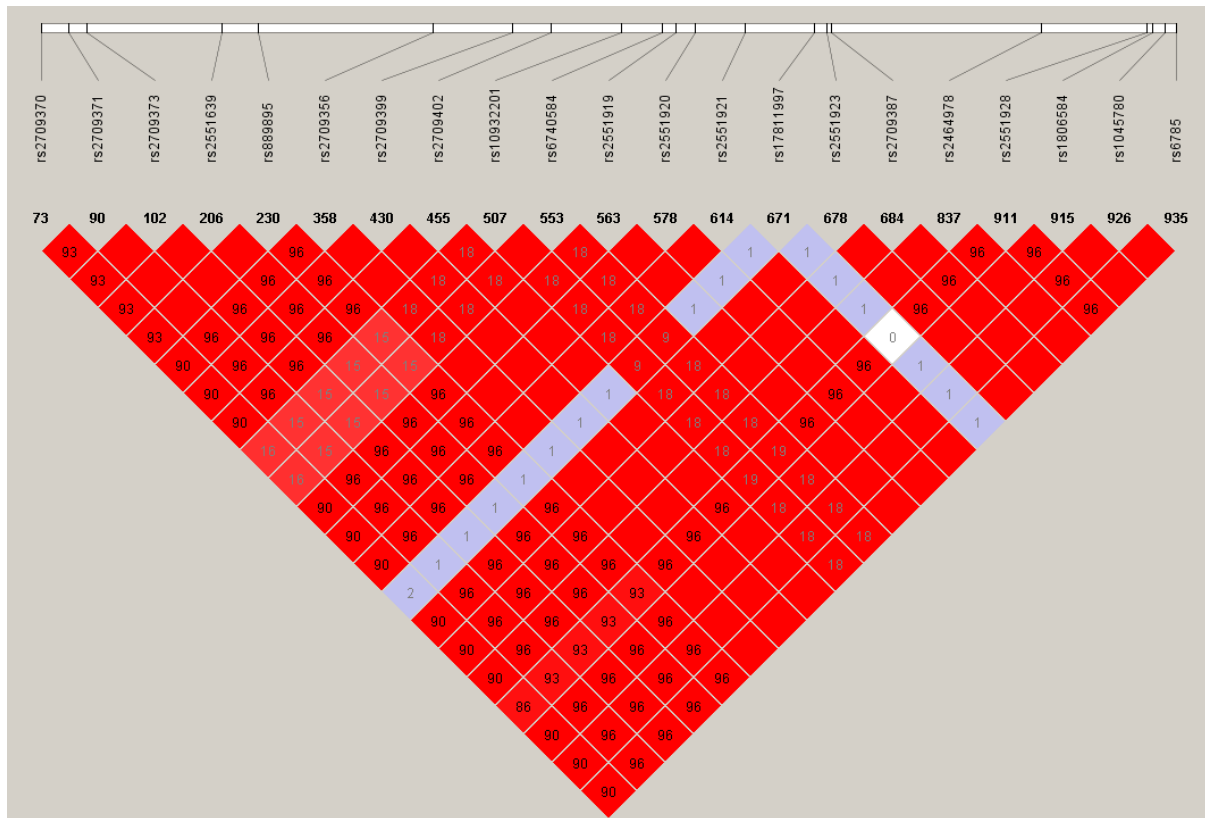

Figure S2. Association of risk SNPs with adjacent gene mRNA expression in Europeans in Dimas *et al.* study.<sup>38</sup>

**rs2709373**

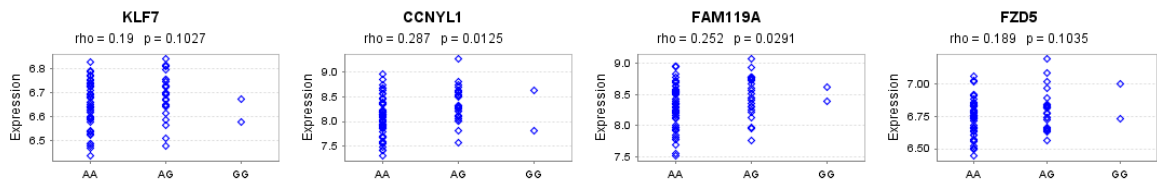

**rs2551949**

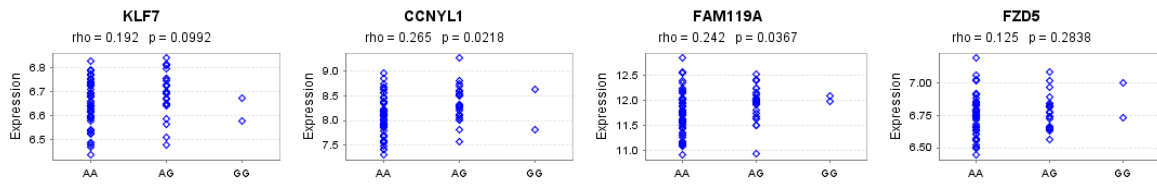

**Figure S3. Prediction of binding affinity with microRNA using the mirSNP database.<sup>39</sup>**

**rs2551928**

| Gene  | miRNA       | Snps      | mirSVR | CEU   | Effect | Allele | Score  | Energy | Conservation | Start | End | binding                                                                                                |
|-------|-------------|-----------|--------|-------|--------|--------|--------|--------|--------------|-------|-----|--------------------------------------------------------------------------------------------------------|
| CREB1 | hsa-miR-618 | rs2551928 |        | 0.199 | create | A      |        |        |              |       |     |                                                                                                        |
|       |             |           |        |       |        | G      | 142.00 | -13.15 | 0.322        | 2     | 31  | Query: 3' ugAGUCUUCUG-UU-C-----AUCUCAaA 5'<br>     :     <br>Ref: 5' atTAAGTAGGGCTAATGTAICTTAGAGTTa 3' |

**rs1806584**

| Gene  | miRNA          | Snps      | mirSVR | CEU   | Effect | Allele | Score  | Energy | Conservation | Start | End | binding                                                                                                        |
|-------|----------------|-----------|--------|-------|--------|--------|--------|--------|--------------|-------|-----|----------------------------------------------------------------------------------------------------------------|
| CREB1 | hsa-miR-4325   | rs1806584 | -0.019 | 0.183 | break  | A      | 148.00 | -11.75 | 0.000        | 10    | 27  | Query: 3' agUGACUCUGUUCACGUu 5'<br>     <br>Ref: 5' aaATAACTCAAGTGCAt 3'                                       |
|       |                |           |        |       |        | G      |        |        |              |       |     |                                                                                                                |
| CREB1 | hsa-miR-491-3p | rs1806584 | -0.018 | 0.183 | break  | A      | 148.00 | -16.92 | 0.007        | 1     | 30  | Query: 3' cauCUUCCC--UUA--GA----ACGUAUUc 5'<br>                  <br>Ref: 5' attGAAGGCAAAATAACTCAAGTGCATAAT 3' |
|       |                |           |        |       |        | G      |        |        |              |       |     |                                                                                                                |
| CREB1 | hsa-miR-521    | rs1806584 |        | 0.183 | create | A      |        |        |              |       |     |                                                                                                                |
|       |                |           |        |       |        | G      | 146.00 | -13.77 | 0.001        | 7     | 28  | Query: 3' ugugagauUUCUUCACGCAa 5'<br>        <br>Ref: 5' gggaaaataACTCAAGTGCgTa 3'                             |
| CREB1 | hsa-miR-656    | rs1806584 | -0.010 | 0.183 | break  | A      | 149.00 | -5.64  | 0.010        | 13    | 33  | Query: 3' ucuccaacUGACAUUUUAUAa 5'<br>        <br>Ref: 5' ataactcaAGTGCATAATAT 3'                              |
|       |                |           |        |       |        | G      |        |        |              |       |     |                                                                                                                |

**rs1045780**

| Gene  | miRNA           | Snps      | mirSVR | CEU   | Effect | Allele | Score  | Energy | Conservation | Start | End | binding                                                                                            |
|-------|-----------------|-----------|--------|-------|--------|--------|--------|--------|--------------|-------|-----|----------------------------------------------------------------------------------------------------|
| CREB1 | hsa-miR-4445-5p | rs1045780 |        | 0.195 | break  | A      | 161.00 | -13.25 | 0.199        | 9     | 29  | Query: 3' acgUGCCGUUUUCUUUAGa 5'<br>     :     <br>Ref: 5' taaAAGG-AAAATGAACAATCt 3'               |
|       |                 |           |        |       |        | G      |        |        |              |       |     |                                                                                                    |
| CREB1 | hsa-miR-548u    | rs1045780 |        | 0.195 | create | A      |        |        |              |       |     |                                                                                                    |
|       |                 |           |        |       |        | G      | 167.00 | -16.25 | 0.026        | 8     | 32  | Query: 3' gcgUUUCAUUAAc--GUCAGAAAc 5'<br>   :             <br>Ref: 5' gtaAAAGGAAAATGAACAGTCTITt 3' |

**rs6785**

| Gene  | miRNA            | Snps   | mirSVR | CEU   | Effect   | Allele | Score  | Energy | Conservation | Start | End | binding                                                                                            |
|-------|------------------|--------|--------|-------|----------|--------|--------|--------|--------------|-------|-----|----------------------------------------------------------------------------------------------------|
| CREB1 | hsa-miR-26a-1-3p | rs6785 | -0.024 | 0.186 | break    | A      | 145.00 | -13.36 | 1.000        | 8     | 28  | Query: 3' gcacguuCAUUGGUUUUAUCc 5'<br> :       <br>Ref: 5' ctgctttGTGTTC-AGAATAGt 3'               |
|       |                  |        |        |       |          | G      |        |        |              |       |     |                                                                                                    |
| CREB1 | hsa-miR-26a-2-3p | rs6785 | -0.024 | 0.186 | break    | A      | 149.00 | -10.34 | 1.000        | 8     | 28  | Query: 3' cuuuguuCAUUGGUUUUAUCc 5'<br> :       <br>Ref: 5' ctgctttGTGTTC-AGAATAGt 3'               |
|       |                  |        |        |       |          | G      |        |        |              |       |     |                                                                                                    |
| CREB1 | hsa-miR-330-3p   | rs6785 | -0.061 | 0.186 | decrease | A      | 150.00 | -14.35 | 1.000        | 22    | 42  | Query: 3' agagaGUCGGCACACGAAAc 5'<br> :       <br>Ref: 5' gaatgTA-GCAGT-TGCTTTGt 3'                |
|       |                  |        |        |       |          | G      | 140.00 | -8.58  | 1.000        | 1     | 16  | Query: 3' agagacguccggcacACGAAAc 5'<br>     <br>Ref: 5' -----ataatagcTGCITTTGt 3'                  |
| CREB1 | hsa-miR-330-3p   | rs6785 | -0.061 | 0.186 | enhance  | A      | 140.00 | -8.58  | 1.000        | 1     | 16  | Query: 3' agagacguccggcacACGAAAc 5'<br>     <br>Ref: 5' -----ataatagcTGCITTTGt 3'                  |
|       |                  |        |        |       |          | G      | 150.00 | -14.52 | 1.000        | 22    | 42  | Query: 3' agagaGUCGGCACACGAAAc 5'<br> :       <br>Ref: 5' gaatgTA-GCAGT-TGCTTTGt 3'                |
| CREB1 | hsa-miR-524-5p   | rs6785 | -0.054 | 0.186 | decrease | A      | 153.00 | -13.92 | 1.000        | 20    | 44  | Query: 3' cuUUU-UCA-CG-AAGGAAACAUC 5'<br>         :       <br>Ref: 5' caGAATAGTAGCAGTTGCTTTGtAT 3' |
|       |                  |        |        |       |          | G      | 149.00 | -13.47 | 1.000        | 20    | 44  | Query: 3' cuUUU-UCA-CG-AAGGAAACAUC 5'<br>         :       <br>Ref: 5' caGAATAGTAGCAGTTGCTTTGtAT 3' |

Figure S4. Global distribution of a risk SNP rs2709370 allele in major world populations

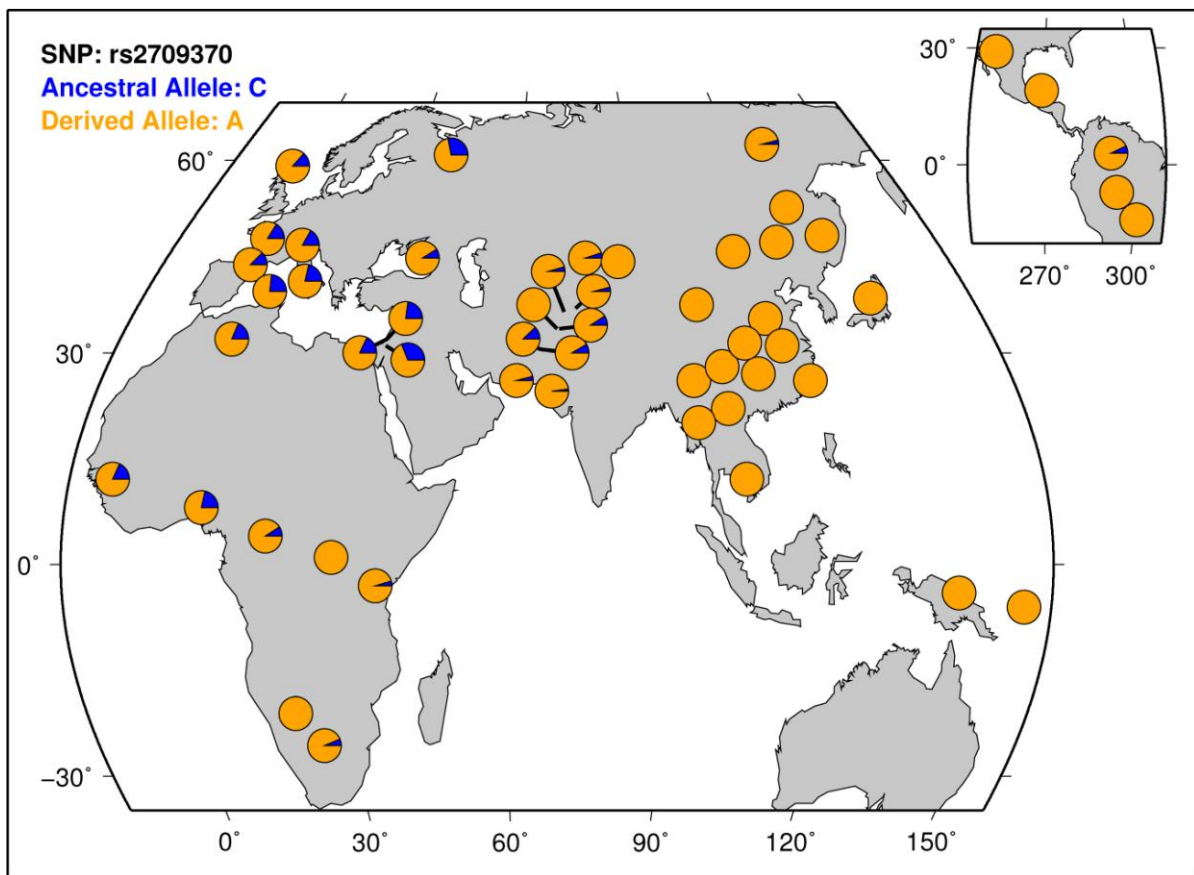

\*The ancestral allele C is the risk allele

**Figure S5. mRNA expression analyses of CREB1 in the brain of bipolar disorder patients and controls in an online database (<https://www.stanleygenomics.org>)**

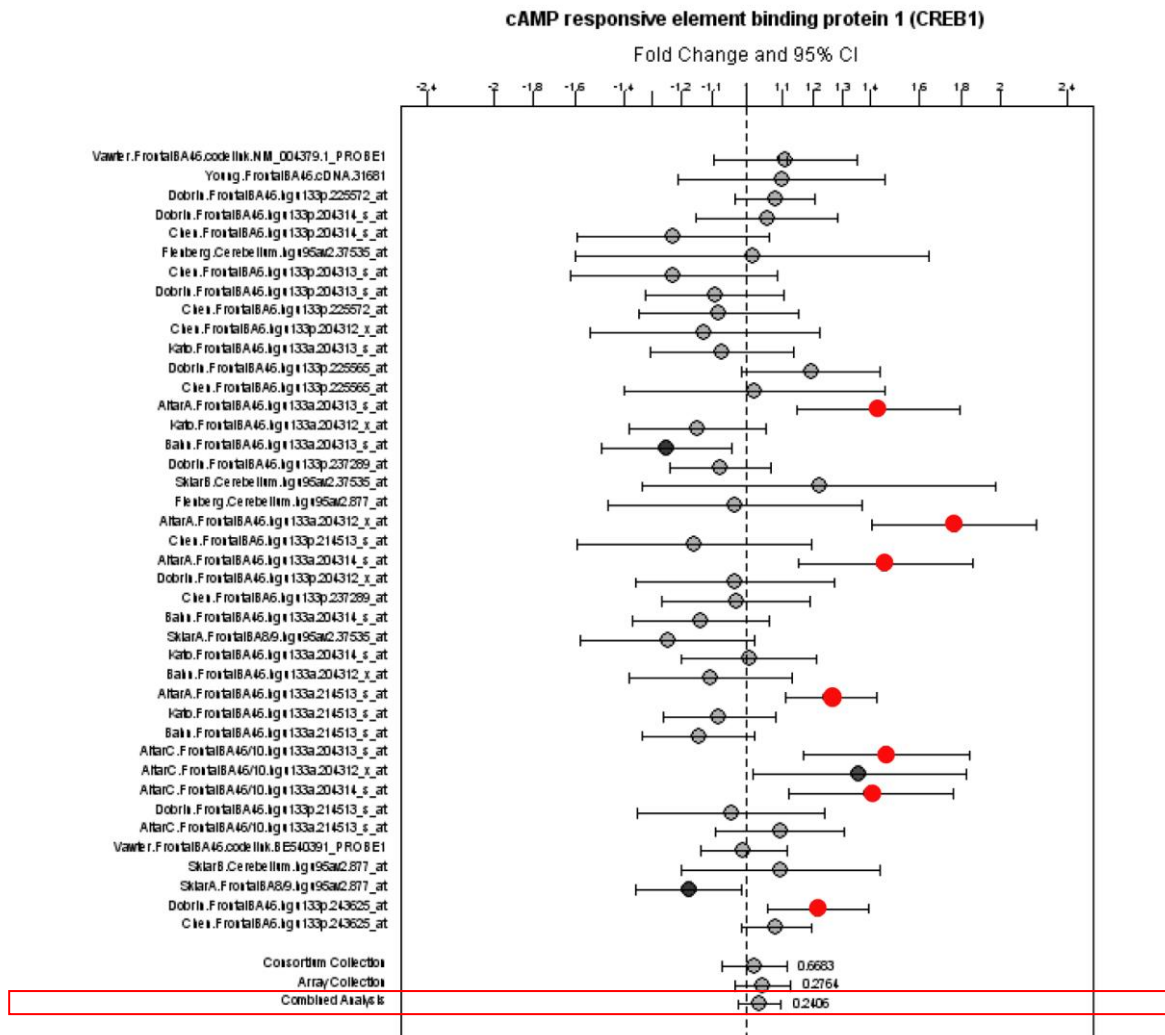

Spots indicate the mean fold change of CREB1 mRNA expression in bipolar disorder patients as compared with normal controls in individual studies and the combined analysis (labeled by the red box). Among the 41 individual studies, 19 studies reported up-regulation of CREB1 in bipolar disorder patients as compared with normal controls, with 7 of them reaching statistical significance ( $P < 0.01$  [red spot]), and 21 studies found down-regulations of CREB1 in bipolar disorder patients compared with normal controls, but none of them reached statistical significance ( $P < 0.01$ ). The combined analysis indicated a slight increase in CREB1 expression in BD patients than controls, though not significantly (combined  $P = 0.2406$ ).

## REFERENCES

1. Nurnberger JI, Jr., Blehar MC, Kaufmann CA, York-Cooler C, Simpson SG, Harkavy-Friedman J *et al.* Diagnostic interview for genetic studies. Rationale, unique features, and training. NIMH Genetics Initiative. *Arch Gen Psychiatry* 1994; **51**: 849-859; discussion 863-864.
2. Spitzer RL, Williams JB, Gibbon M, First MB. The Structured Clinical Interview for DSM-III-R (SCID). I: History, rationale, and description. *Arch Gen Psychiatry* 1992; **49**: 624-629.
3. Sheehan DV, Lecrubier Y, Sheehan KH, Amorim P, Janavs J, Weiller E *et al.* The Mini-International Neuropsychiatric Interview (M.I.N.I.): the development and validation of a structured diagnostic psychiatric interview for DSM-IV and ICD-10. *J Clin Psychiatry* 1998; **59 Suppl 20**: 22-33;quiz 34-57.
4. Sellgren C, Landen M, Lichtenstein P, Hultman CM, Langstrom N. Validity of bipolar disorder hospital discharge diagnoses: file review and multiple register linkage in Sweden. *Acta Psychiatr Scand* 2011; **124**: 447-453.
5. McGuffin P, Farmer A, Harvey I. A polydiagnostic application of operational criteria in studies of psychotic illness. Development and reliability of the OPCRIT system. *Arch Gen Psychiatry* 1991; **48**: 764-770.
6. Schmermund A, Mohlenkamp S, Stang A, Gronemeyer D, Seibel R, Hirche H *et al.* Assessment of clinically silent atherosclerotic disease and established and novel risk factors for predicting myocardial infarction and cardiac death in healthy middle-aged subjects: rationale and design of the Heinz Nixdorf RECALL Study. Risk Factors, Evaluation of Coronary Calcium and Lifestyle. *Am Heart J* 2002; **144**: 212-218.
7. McAuley EZ, Fullerton JM, Blair IP, Donald JA, Mitchell PB, Schofield PR. Association between the serotonin 2A receptor gene and bipolar affective disorder in an Australian cohort. *Psychiatr Genet* 2009; **19**: 244-252.
8. Mitchell PB, Johnston AK, Corry J, Ball JR, Malhi GS. Characteristics of bipolar disorder in an Australian specialist outpatient clinic: comparison across large datasets. *Aust N Z J Psychiatry* 2009; **43**: 109-117.
9. Cohen-Woods S, Gaysina D, Craddock N, Farmer A, Gray J, Gunasinghe C *et al.* Depression Case Control (DeCC) Study fails to support involvement of the muscarinic acetylcholine receptor M2 (CHRM2) gene in recurrent major depressive disorder. *Hum Mol Genet* 2009; **18**: 1504-1549.
10. Farmer A, Breen G, Brewster S, Craddock N, Gill M, Korszun A *et al.* The Depression Network (DeNT) Study: methodology and sociodemographic characteristics of the first 470 affected sibling pairs from a large multi-site linkage genetic study. *BMC Psychiatry* 2004; **4**: 42.
11. McGuffin P, Knight J, Breen G, Brewster S, Boyd PR, Craddock N *et al.* Whole genome linkage scan of recurrent depressive disorder from the depression network study. *Hum Mol Genet* 2005; **14**: 3337-3345.
12. Uher R, Maier W, Hauser J, Marusic A, Schmael C, Mors O *et al.* Differential efficacy of escitalopram and nortriptyline on dimensional measures of depression. *Br J Psychiatry* 2009; **194**: 252-259.
13. Uher R, Huezo-Diaz P, Perroud N, Smith R, Rietschel M, Mors O *et al.* Genetic predictors of response to antidepressants in the GENDEP project. *Pharmacogenomics J* 2009; **9**: 225-233.
14. Wing JK, Babor T, Brugha T, Burke J, Cooper JE, Giel R *et al.* SCAN. Schedules for Clinical Assessment in Neuropsychiatry. *Arch Gen Psychiatry* 1990; **47**: 589-593.
15. Sham PC, Sterne A, Purcell S, Cherny S, Webster M, Rijdsdijk F *et al.* GENESiS: creating a composite index of the vulnerability to anxiety and depression in a community-based sample of siblings. *Twin Res* 2000; **3**: 316-322.
16. McGuffin P, Katz R, Aldrich J. Past and present state examination: the assessment of 'lifetime ever' psychopathology. *Psychol Med* 1986; **16**: 461-465.
17. Hennings JM, Owashi T, Binder EB, Horstmann S, Menke A, Kloiber S *et al.* Clinical characteristics and treatment outcome in a representative sample of depressed inpatients - findings from the Munich Antidepressant Response Signature (MARS) project. *J Psychiatr Res* 2009; **43**: 215-229.
18. Ising M, Lucae S, Binder EB, Bettecken T, Uhr M, Ripke S *et al.* A genomewide association study points to multiple loci that predict antidepressant drug treatment outcome in depression. *Arch Gen Psychiatry* 2009; **66**: 966-975.
19. Heck A, Lieb R, Ellgas A, Pfister H, Lucae S, Erhardt A *et al.* Polymorphisms in the angiotensin-converting enzyme gene region predict coping styles in healthy adults and depressed patients. *Am J Med Genet B Neuropsychiatr Genet* 2009; **150B**: 104-114.
20. Walter H, Schnell K, Erk S, Arnold C, Kirsch P, Esslinger C *et al.* Effects of a genome-wide supported psychosis risk variant on neural activation during a theory-of-mind task. *Mol Psychiatry* 2010; **16**: 462-470.



21. Esslinger C, Walter H, Kirsch P, Erk S, Schnell K, Arnold C *et al.* Neural mechanisms of a genome-wide supported psychosis variant. *Science* 2009; **324**: 605.
22. Erk S, Meyer-Lindenberg A, Schnell K, Opitz von Boberfeld C, Esslinger C, Kirsch P *et al.* Brain function in carriers of a genome-wide supported bipolar disorder variant. *Arch Gen Psychiatry* 2010; **67**: 803-811.
23. Abecasis GR, Auton A, Brooks LD, DePristo MA, Durbin RM, Handsaker RE *et al.* An integrated map of genetic variation from 1,092 human genomes. *Nature* 2012; **491**: 56-65.
24. Howie BN, Donnelly P, Marchini J. A flexible and accurate genotype imputation method for the next generation of genome-wide association studies. *PLoS Genet* 2009; **5**: e1000529.
25. Friedman L, Glover GH. Report on a multicenter fMRI quality assurance protocol. *J Magn Reson Imaging* 2006; **23**: 827-839.
26. Walters JT, Corvin A, Owen MJ, Williams H, Dragovic M, Quinn EM *et al.* Psychosis susceptibility gene ZNF804A and cognitive performance in schizophrenia. *Arch Gen Psychiatry* 2010; **67**: 692-700.
27. Donohoe G, Walters J, Morris DW, Quinn EM, Judge R, Norton N *et al.* Influence of NOS1 on verbal intelligence and working memory in both patients with schizophrenia and healthy control subjects. *Arch Gen Psychiatry* 2009; **66**: 1045-1054.
28. Sklar P, Ripke S, Scott LJ, Andreassen OA, Cichon S, Craddock N *et al.* Large-scale genome-wide association analysis of bipolar disorder identifies a new susceptibility locus near ODZ4. *Nat Genet* 2011; **43**: 977-983.
29. Etain B, Dumaine A, Mathieu F, Chevalier F, Henry C, Kahn JP *et al.* A SNAP25 promoter variant is associated with early-onset bipolar disorder and a high expression level in brain. *Mol Psychiatry* 2009; **15**: 748-755.
30. Cichon S, Muhleisen TW, Degenhardt FA, Mattheisen M, Miro X, Strohmaier J *et al.* Genome-wide association study identifies genetic variation in neurocan as a susceptibility factor for bipolar disorder. *Am J Hum Genet* 2011; **88**: 372-381.
31. Muglia P, Tozzi F, Galwey NW, Francks C, Upmanyu R, Kong XQ *et al.* Genome-wide association study of recurrent major depressive disorder in two European case-control cohorts. *Mol Psychiatry* 2008; **15**: 589-601.
32. Medland SE, Nyholt DR, Painter JN, McEvoy BP, McRae AF, Zhu G *et al.* Common variants in the trichohyalin gene are associated with straight hair in Europeans. *Am J Hum Genet* 2009; **85**: 750-755.
33. McAuley EZ, Blair IP, Liu Z, Fullerton JM, Scimone A, Van Herten M *et al.* A genome screen of 35 bipolar affective disorder pedigrees provides significant evidence for a susceptibility locus on chromosome 15q25-26. *Mol Psychiatry* 2009; **14**: 492-500.
34. McMahon FJ, Akula N, Schulze TG, Muglia P, Tozzi F, Detera-Wadleigh SD *et al.* Meta-analysis of genome-wide association data identifies a risk locus for major mood disorders on 3p21.1. *Nat Genet* 2010; **42**: 128-131.
35. Lewis CM, Ng MY, Butler AW, Cohen-Woods S, Uher R, Pirlo K *et al.* Genome-wide association study of major recurrent depression in the U.K. population. *Am J Psychiatry* 2010; **167**: 949-957.
36. Erhardt A, Czibere L, Roeske D, Lucae S, Unschuld PG, Ripke S *et al.* TMEM132D, a new candidate for anxiety phenotypes: evidence from human and mouse studies. *Mol Psychiatry* 2010; **16**: 647-663.
37. Boyle AP, Hong EL, Hariharan M, Cheng Y, Schaub MA, Kasowski M *et al.* Annotation of functional variation in personal genomes using RegulomeDB. *Genome Res* 2012; **22**: 1790-1797.
38. Dimas AS, Deutsch S, Stranger BE, Montgomery SB, Borel C, Attar-Cohen H *et al.* Common regulatory variation impacts gene expression in a cell type-dependent manner. *Science* 2009; **325**: 1246-1250.
39. Liu C, Zhang F, Li T, Lu M, Wang L, Yue W *et al.* MirSNP, a database of polymorphisms altering miRNA target sites, identifies miRNA-related SNPs in GWAS SNPs and eQTLs. *BMC Genomics* 2012; **13**: 661.
